# Supplementary material for: A haptic-robotic platform for upper-limb reaching stroke therapy: Preliminary design and evaluation results
Source: Springer Nature journal article supplement (doi:10.1186/1743-0003-5-15), 2008-05-22
Supplement: 12984_2007_139_MOESM4_ESM.pdf [file 12984_2007_139_MOESM4_ESM.pdf]

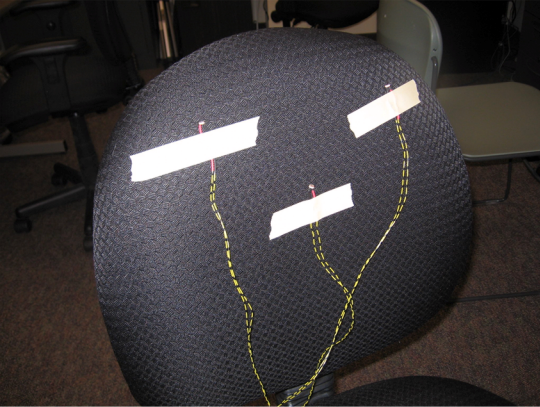

(a)

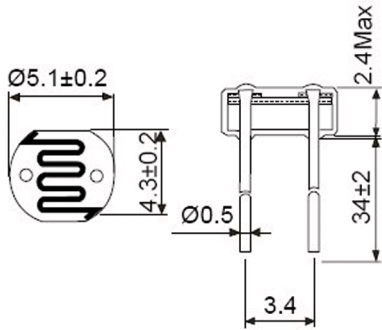

(b)
